# Supplementary material for: Brexanolone therapeutics in post-partum depression involves inhibition of systemic inflammatory pathways
Source: PubMed Central journal article supplement — eBioMedicine. 2023 Feb 16;89:104473. doi: 10.1016/j.ebiom.2023.104473 (PMC9984433; doi:10.1016/j.ebiom.2023.104473), 2023-02-16
Supplement: mmc2.pdf [file mmc2.pdf]

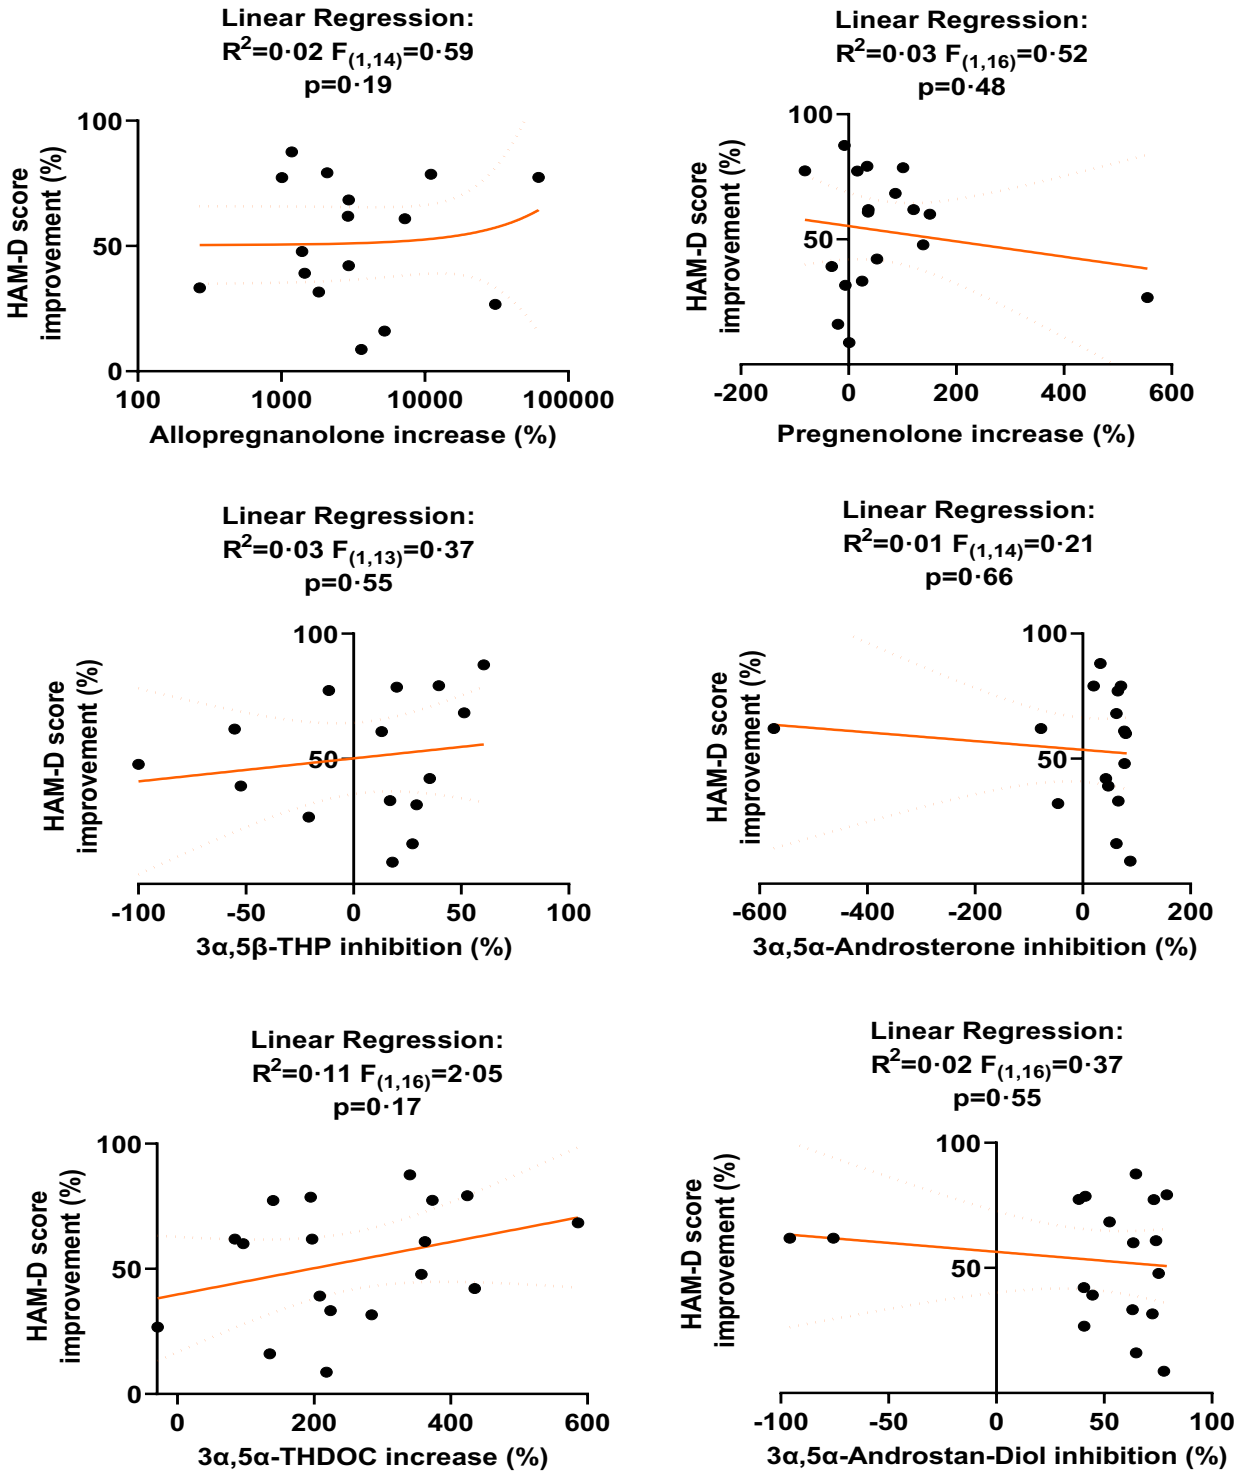

**Figure S1.** Changes in allopregnanolone, pregnanolone ( $3\alpha,5\beta$ -THP), allotetrahydrodeoxycorticosterone ( $3\alpha,5\alpha$ -THDOC), pregnenolone,  $3\alpha,5\alpha$ -androsterone or  $3\alpha,5\alpha$ -androstan-diol) in serum of post-partum depression (PPD) patients did not predict a decrease (improvement) in HAM-D score. To determine if the % change in each steroid in serum of PPD patients (N=15-18) after brexanolone infusion was correlated with the % decrease (improvement) in HAM-D score, linear regression analysis was applied and the coefficient of determination ( $R^2$  value), F statistic, degrees of freedom, and p value were examined. No effects were found ( $p>0.05$ ).
